# Supplementary material for: Single‐Cell Transcriptomics Reveals a Pivotal Role of DOCK2 in Sjögren Disease
Source: PubMed Central journal article supplement — ACR Open Rheumatol. 2024 Oct 9;6(12):927–43. doi: 10.1002/acr2.11738 (PMC11638132; doi:10.1002/acr2.11738), 2024-10-09
Supplement: ACR2-6-927-s001.pdf [file ACR2-6-927-s001.pdf]

**Single-cell transcriptomics reveals a pivotal role of DOCK2 in Sjögren's disease.**

1 **Yiran Shen<sup>1</sup>, Alexandria Voigt<sup>1</sup>, Indraneel Bhattacharyya<sup>2</sup>, Cuong Q. Nguyen<sup>1,3,4\*</sup>**

2 <sup>1</sup>Department of Infectious Diseases and Immunology, College of Veterinary Medicine, University  
3 of Florida. <sup>2</sup>Department of Oral and Maxillofacial Diagnostic Sciences, University of Florida  
4 College of Dentistry, <sup>3</sup>Department of Oral Biology, College of Dentistry, <sup>4</sup>Center of Orphaned  
5 Autoimmune Diseases, University of Florida, Gainesville, Florida, USA.

6

7 **\*Correspondence author**

8 Cuong Q. Nguyen, PhD

9 Department of Infectious Diseases and Immunology

10 PO Box 110880, College of Veterinary Medicine

11 University of Florida, Gainesville, Florida 32611-0880 USA

12 Telephone: 352-294-4180, Fax: 352-392-9704

13 [nguyenc@ufl.edu](mailto:nguyenc@ufl.edu)

14

15

## 16 **Methods**

### 17 **Mice**

18 SjD-susceptible (SjD<sup>s</sup>) C57BL/6 J.NOD-*Aec1/2* and non-SjD<sup>s</sup> C57BL/6 J (B6) control mice were  
19 housed under specific pathogen-free conditions in the animal facilities of the University of Florida  
20 Animal Care Services. The breeding and use of animals described herein were approved by and  
21 conducted under the direction of the University of Florida Institutional Animal Care and Use  
22 Committee. All methods were performed per the relevant guidelines and regulations. The  
23 development of C57BL/6.NOD-*Aec1/2* mouse and its SjD-like disease phenotype are described  
24 previously (1,2). Briefly, the SjD<sup>s</sup> mouse was developed by introducing two genetic regions, one  
25 on chromosome 1 (designated *Aec2*) and the second on chromosome 3 (designated *Aec1*)  
26 derived from the NOD/LtJ mouse into the B6 mouse. All animals were maintained on a 12-hour  
27 light-dark schedule, and food and acidified water were provided ad libitum. At times indicated in  
28 the study, mice were euthanized by cervical dislocation after deep anesthetization with isoflurane,  
29 and their organs and tissues were freshly harvested for analyses. Utilizing the therapeutic  
30 approach, mice aged 28 weeks were treated with a DOCK2 inhibitor, CPYPP (4-[3-(2-  
31 Chlorophenyl)-2-propen-1-ylidene]-1-phenyl-3,5-pyrazolidinedione, TOCRIS, Minneapolis, MN).  
32 CPYPP blocks DOCK2 by binding to DOCK2 DHR-2 (DOCK homology region 2) domain and  
33 inhibits its catalytic activity (1). The mice were chosen at 28 weeks of age due the fact that at this  
34 age, mice have developed advanced clinical signs of SjD. Mice were given an initial dose of 100  
35 uL of either 50 mg/mL CPYPP in DMSO or DMSO alone as control via intraperitoneal (IP) injection.  
36 Three more DMSO or CPYPP IP injections were given on days 3, 9, and 12 before euthanasia  
37 on day 14.

### 38 **Human samples**

39 Immunofluorescent staining for CD8 and DOCK2 was performed on five sicca control and six SjD  
40 patients. Sicca control patients were defined as those with xerostomia but without meeting the  
41 criteria for an SjD diagnosis; they were referred to the Oral Medicine Clinic at the University of  
42 Florida. Biopsies were obtained as reviewed and approved by the University of Florida's  
43 Institutional Review Board. SjD patients were identified by a rheumatologist, having met the  
44 criteria outlined by the 2016 American College of Rheumatology/European League Against  
45 Rheumatism (3). In brief, the classification criteria are based on the weighted sum of 5 items: anti-  
46 SSA(Ro) antibody positivity and focal lymphocytic sialadenitis with a focus score  $\geq 1$  foci/mm<sup>2</sup>,  
47 each scoring 3; an abnormal ocular staining score  $\geq 5$  (or van Bijsterveld score  $\geq 4$ ), a Schirmer  
48 test  $\leq 5$  mm/5 min, and an unstimulated salivary flow rate  $\leq 0.1$  mL/min, each scoring 1.  
49 Individuals with a total score  $\geq 4$  for 5 items meet the criteria for primary SjD. Paraffin-embedded  
50 labial salivary gland slides of primary SjD patients were generously provided by The SICCA  
51 Biorepository and Data Registry. Available clinical profiles were presented in **Table S1**.

## 52 **Immunofluorescent staining**

53 Salivary glands from DMSO and CPYPP-treated SjD<sup>s</sup> mice were extracted and fixed in 10%  
54 phosphate-buffered formalin in a histology cassette for 24 hours. Glands were paraffin-embedded  
55 and sectioned at 10 $\mu$ m (Histology Tech Services, Gainesville, FL). Paraffin-embedded biopsy  
56 samples were pressure-cooked in Trilogy (Cell Marque, Rocklin, CA) for 5 minutes and 10 minutes  
57 for mouse salivary glands. After blocking with donkey sera (1 hour, room temperature), primary  
58 staining for human CD8 (Abcam, Cambridge, UK) or mouse CD8 (Santa Cruz Biotechnology,  
59 Dallas, TX) with DOCK2 (Bioss, Woburn, MA) was performed (4°C, overnight). The following  
60 secondary antibodies (Invitrogen, Waltham, MA) were used for humans: donkey anti-mouse  
61 AF594 and donkey anti-rabbit AF488. For mice, these secondary antibodies were used: donkey  
62 anti-rat AF594 and donkey anti-rabbit AF 488. Secondary antibodies were each incubated at room

63 temperature for 1 hour. Images were captured with a Nikon Ti-E fluorescent microscope at 400x  
64 magnification. Deconvolution was performed in Nikon NIS Elements. For the enumeration of CD8  
65 T cells, a manual count was performed on a 100x magnification of the field containing an infiltrate,  
66 and then ROI intersectional thresholding was used to identify CD8+DOCK2+ cells.

### 67 **10x Genomics single-cell sample processing and cDNA library preparation**

68 Samples were prepared using the Chromium Next GEM Single Cell V(D)J Kit v1.1, Mouse (10x  
69 Genomics, Pleasanton, CA) following the manufacturer's instructions. In brief, sorted single cells  
70 of the salivary glands for each sample were resuspended in RPMI containing 10% FBS to a final  
71 concentration of 700-1200 cells/ $\mu$ l. A total of 8 samples were loaded onto a Chromium Next GEM  
72 Chip G, analyzed by the Chromium Controller (10x Genomics, Pleasanton, CA) for Gel Beads-in-  
73 emulsion (GEMs) generation and reverse transcription. The generated cDNA was purified with  
74 SPRIselect (Beckman Coulter Inc, Indianapolis, IN) and used for 5' gene expression library  
75 construction. The cDNAs and libraries were examined for quality control using D5000 ScreenTape  
76 (Agilent Technologies, Waldbronn, Germany), and Qubit (Thermo Fisher Scientific, Waltham, MA)  
77 was used for quantification. To achieve 20,000 reads per cell for 5' gene expression libraries, the  
78 libraries were sequenced using Illumina NovaSeq6000 system (Illumina, San Diego, CA).

### 79 **Measurement of saliva flow**

80 Saliva flow rate (SFR) was recorded prior to drug injection (baseline), then every seven days.  
81 Briefly, mice were weighed and given an IP injection of 100  $\mu$ l isoproterenol (0.2 mg/1 ml of PBS)  
82 and pilocarpine (0.05 mg/1 ml of PBS) to stimulate saliva production. Saliva was collected from  
83 the oral cavity with a pipet for ten minutes, with a one-minute break at the midpoint. Saliva was  
84 briefly centrifuged, and the SFR was calculated as the volume of saliva ( $\mu$ L) per gram (weight of  
85 mouse)

### 86 **Pathological examination of the mouse salivary glands**

87 Salivary glands were fixed in 10% phosphate-buffered formalin for 24 hours. The tissues were  
88 paraffin-embedded; sections were cut at a 5-um thickness and mounted onto slides, followed by  
89 hematoxylin and eosin (H&E) staining. Stained sections were observed at 200x magnification by  
90 using a Nikon Eclipse Ti-E inverted microscope (Nikon, Tokyo, Japan). Focus score were  
91 determined by enumerating lymphocytic aggregates of  $\geq 50$  leukocytes for a single whole salivary  
92 gland per mouse.

### 93 **Detection of antinuclear antibodies**

94 Sera of mice was analyzed for the presence of antinuclear antibodies (ANAs) per the  
95 manufacturer's instructions (Immuno Concepts, Sacramento, CA). Briefly, sera were evaluated at  
96 1:40 in PBS and incubated on HEP-2 ANA slides for 30 minutes at room temperature. The  
97 secondary antibody, goat anti-mouse IgG AF488 (Invitrogen, Waltham, MA, A11001), was  
98 incubated at room temperature on the slide before sealing with Vectashield DAPI medium (Vector  
99 Laboratories, Burlingame, CA) and adding a glass coverslip. ANA staining pattern was observed  
100 at 400x with a Nikon Ti-E fluorescent microscope with an exposure of 200 ms (Nikon, Tokyo,  
101 Japan). Samples positive at 1:40 dilution were further titered for ANA analysis.

### 102 **Analysis of tissues via flow cytometry**

103 Salivary glands were excised, and single cells were isolated as previously described (4). Cells  
104 were rinsed, resuspended in FACS buffer, and stained (30 minutes, on ice) with Live/Dead Fixable  
105 Aqua Dead Cell Stain Kit, for 405 emission (Life Technologies, Carlsbad, CA) with either a B or T  
106 cell panel as follows: B cells: BV650 rat anti-mouse/human CD45R/B220 (Biolegend, Cat #  
107 103241, San Diego, CA), FITC rat anti-mouse CD23 (Biolegend, Cat # 101605, San Diego, CA),  
108 PE rat anti-mouse CD21/CD35 (CR2/CR1) (Biolegend, Cat # 123419, San Diego, CA), AF700 rat  
109 anti-mouse IgD (Biolegend, Cat # 405729, San Diego, CA), BV421 rat anti-mouse IgM (Biolegend,  
110 Cat # 406517, San Diego, CA); T cells: BV 785 rat anti-mouse CD3 (Biolegend, Cat # 100355,

111 San Diego, CA), FITC Rat Anti-Mouse CD4 (Biolegend, Cat # 116004, San Diego, CA), APC rat  
112 anti-mouse IFN- $\gamma$  (Biolegend, Cat # 505810, San Diego, CA), PE rat anti-mouse CD8 (BD  
113 Pharmingen, Cat # MCD0804, Franklin Lakes, NJ), PE/Cy7 rat anti-mouse IL-4 (Biolegend, Cat  
114 # 504118, San Diego, CA), BV 421 rat anti-mouse IL-17A (Biolegend, Cat # 506926, San Diego,  
115 CA), and APC-eF780 Mouse Anti-Mouse NK-1.1 ( eBioscience, Cat # 47-5941-80, Franklin Lakes,  
116 NJ). Samples were run on a BD Fortessa flow cytometer, where 100,000 events were captured;  
117 in cases where a full 100,000 events were not available, the entire sample was run. Individual  
118 antibody compensations were performed using BD CompBeads (BD Biosciences, Franklin Lakes,  
119 NJ); in addition to negative compensation bead control, unstained salivary glands were also  
120 utilized to confirm gating strategy. Likewise, paired lymph nodes were used as a lymphocyte pure  
121 control to also confirm gating with a more robust cell density. Results were analyzed on FlowJo  
122 (FlowJo, Ashland, OR) prior to data processing with GraphPad Prism. For all samples, live  
123 lymphocyte populations were first selected. Then T cells were selected for either CD4<sup>+</sup> or CD8<sup>+</sup>  
124 for Th1 and Th17 (CD4<sup>+</sup>) or Tc1 and Tc17 (CD8<sup>+</sup>) subsets. FO I were IgM<sup>-</sup>IgD<sup>+</sup>CD23<sup>+</sup>, FO II were  
125 IgM<sup>+</sup>IgD<sup>+</sup>CD23<sup>+</sup>, and MZB were IgM<sup>+</sup>IgD<sup>-</sup>CD21<sup>+</sup>CD23<sup>+</sup>.

## 126 **Tissue isolation and cell preparation**

127 Salivary glands of C57BL/6.NOD-*Aec1/2* (51 weeks old, n=2 female, 2 male) and B6 (64 weeks  
128 old, n=2 female, 2 male) mice were explanted and digested in a buffer containing 1 mg/ml DNase  
129 (Sigma-Aldrich, St. Louis, MO) and 1 mg/ml Collagenase Type 4 (Worthington, Lakewood, NJ,  
130 USA) in RPMI (Lonza, Allendale, NJ) complete media (10% FBS, 2 mM L-glutamine, 0.05 mM  $\beta$ -  
131 mercaptoethanol). Tissues were placed in a MACS C tube (Miltenyi Biotec, San Diego, CA) for  
132 desiccation on GentleMACS V1.02 for a pulse of 38 seconds. After a 10-minute incubation at  
133 37°C, the digest buffer was removed and placed into 4°C RPMI complete media. The process  
134 was repeated twice. Single-cell suspensions were centrifuged (2500 rpm, 10 min, 4°C) and  
135 resuspended in PBS for filtration through a 70- $\mu$ m sterile cell strainer (Fisher, Pittsburgh, PA).

136 After a wash with PBS, cells were resuspended again in PBS for lymphocyte isolation with  
137 Lympholyte-M cell separation media (Cedar Lane, Burlington, Canada) per the manufacturer's  
138 instructions. Single-cell suspensions were stained for DAPI, and live cells were sorted with a  
139 sorter (SH800S, Sony, San Jose, CA) into RPMI containing 10% FBS on ice for single-cell  
140 sequencing library preparation.

#### 141 **Single-cell data preprocessing, gene expression quantification, and cell-type** 142 **determination**

143 The raw data from each sample were demultiplexed and aligned to the GRCm38 reference  
144 genome, and the UMI counts were quantified using the 10x Genomics Cell Ranger pipeline (v  
145 7.0.1). Data analysis continued with the filtered barcode matrix files using the Seurat package (v  
146 4.3.0.1). Cells with >200 detected features and <10% mitochondrial reads were considered valid.  
147 LogNormalize in Seurat was used for individual samples before merging for downstream analysis  
148 to prevent clusters from being biased by differential sequencing depth. FindVariableFeatures was  
149 applied to normalize and find variable features within the single-cell gene expression data, with  
150 'vst' as method to choose top 2000 variable features. Clustering and differential expression  
151 analyses were performed using the R package Seurat with default parameters. Based on the  
152 ElbowPlot, the first 20 principal components (PCs) (1:20) were selected for the clustering analysis  
153 when that number reached the baseline of the standard deviation of the PCs. FindNeighbors uses  
154 the previously identified PCs was applied to calculate the distance between cells in the high-  
155 dimensional space. A resolution of 0.6 was applied in FindClusters function to obtain a meaningful  
156 number of subclusters within the major cell types, which was identified through the clustree  
157 function. Cell clusters were visualized using Uniform Manifold Approximation and Projection  
158 (UMAP). Cells were represented in a 2D UMAP plane with 23 distinct clusters, cells that are in  
159 the same large population and share the vast majority of classical immune cell signatures are  
160 categorized into five major (T cells (*Cd3d*, *Cd3e*, CD4, CD8a), *Cd68* (macrophage), *Ncr1* (NK),

161 and *Cd19* (B cells)) and one minor cluster, of which 23 sub-populations were identified and  
162 annotated within the macro-population according to known biological cell types using canonical  
163 marker genes or published reference gene signatures (5–9).

164 Differential gene expression was performed using model-based analysis of the single-cell  
165 transcriptomics (MAST) test (10) (log fold-change  $\geq 0.25$ , minimum percentage 0.1, and minimum  
166 differential percentage  $> 0.15$ ) to select genes with an adjusted P value  $< 0.01$ . UpSet (v 1.4.0)  
167 was used to make UpSet plots for showing matrix layout of all intersections of the comparison  
168 datasets. scRNAtoolVis (v 0.08) was used to make the volcano plot show the differentially  
169 expressed gene in certain subclusters of each sex and mouse strain. Pathway enrichment  
170 analysis was conducted using Metascape (<http://metascape.org>) for gene function annotation,  
171 and enrichment pathway analysis was used under the default setting. T-like cells (CD3<sup>+</sup>) were  
172 extracted from the global data for downstream analyses to identify T cell subtypes. In the single-  
173 cluster enrichment analysis, the FindAllMarkers function in the Seurat package was performed to  
174 obtain the rank of all genes ('wilcox', log fold-change  $\geq 0.25$ , minimum percentage 0.1, and  
175 minimum differential percentage  $> 0.15$ ). Then, the fgsea package (v1.17.1) was used to calculate  
176 GSEA enrichment scores and P values for each collection of gene sets. Signatures used for  
177 subset identity determination or phenotyping already published are referenced in each figure and  
178 were converted to corresponding mouse genes for analysis. All the analyses were conducted in  
179 the R environment (v.4.3.1).

#### 180 **Gene set variation analysis (GSVA)**

181 Pathway analyses were performed on the 50 hallmark pathways annotated in the molecular  
182 signature database (11). The gene sets we used were from the database MSigDB (v7.4). The  
183 expression mean matrix between different subclusters was counted using the AverageExpression  
184 function as the input for package GSVA (v1.48.2) to calculate the enrich score. To compare the  
185 significance of each group, package limma (v 3.56.2) was used to construct a differential contract



186 matrix and to analyze differences in the enrichment scores for specific groups versus the  
187 remaining groups (e.g., group CD8\_C4 vs. other CD8 cells).

### 188 **Trajectory analysis**

189 Package monocle3 (v 1.3.1) was used to estimate the pseudotime path of T cell differentiation. T  
190 cells were extracted for Trajectory analysis, and the subset of the data set obtained by Seurat  
191 analysis was imported to create a Monocle object. Pseudotime values are assigned to cells using  
192 order\_cells based on the cell projection on the main graph learned by the learn\_graph function  
193 and the location of the selected root state. Genes that vary over a trajectory between clusters  
194 were identified through graph-autocorrelation analysis [graph\_test()] and genes expression trends  
195 of the top 5 differential genes were plotted using plot\_genes\_in\_pseudotime, which is colored by  
196 subclusters in CD4 and CD8 T cells.

### 197 **Statistical analysis**

198 Statistical analyses were performed using Prism 8 software (GraphPad, La Jolla, CA). 2-way  
199 ANOVA, Welch's t-tests, or Mann-Whitney U tests were performed where indicated. In all cases,  
200 p values < 0.05 were considered significant. For the ANA staining, a Chi-squared test was  
201 performed.

202

203

204

205 **Results**

206 **Table S1:** Profile of diagnostic criteria for SjD and sicca controls. Provided here are the results  
207 of the autoantibody tests and focus scores performed on patients and controls. Here, pos  
208 indicates positive, neg indicates negative, and N/A indicates the test was not performed. All SjD  
209 cases met the 2016 ACR-EULAR classification criteria with positive anti-SS-A and focus scores.  
210 The one sicca control patient positive for anti-SS-A did not meet any other criteria for SjD.

| <b>SjD</b> | <b>Anti-SS-A</b> | <b>Anti-SS-B</b> | <b>ANA (Titer <math>\geq</math>320)</b> | <b>Focus Score</b> |
|------------|------------------|------------------|-----------------------------------------|--------------------|
| Neg        | Pos              | Neg              | Neg                                     | 0                  |
| Neg        | Neg              | Neg              | N/A                                     | 0                  |
| Neg        | Neg              | Neg              | Pos                                     | 0                  |
| Neg        | Neg              | Neg              | N/A                                     | 0                  |
| Neg        | Neg              | Neg              | N/A                                     | 0                  |
| Pos        | Pos              | Neg              | Pos                                     | 4                  |
| Pos        | Pos              | Pos              | Pos                                     | 6                  |
| Pos        | Pos              | Pos              | Pos                                     | 6                  |
| Pos        | Pos              | Pos              | Pos                                     | 4                  |
| Pos        | Pos              | Pos              | Pos                                     | 4                  |
| Pos        | Pos              | Neg              | Neg                                     | 5                  |

211

212

213

214 **Table S2: Cell processing profiles for individual sample**

| <b>Sample Name</b> | <b>Loaded Cells (n)</b> | <b>Processed Cells (n)</b> | <b>Median Genes per Cell</b> |
|--------------------|-------------------------|----------------------------|------------------------------|
| B6F1               | 7,483                   | 7,417                      | 1,302                        |
| B6F2               | 8,643                   | 8,442                      | 1,452                        |
| B6M1               | 1,316                   | 1,155                      | 1,690                        |
| B6M2               | 2,057                   | 1,839                      | 1,708                        |
| DCF1               | 2,528                   | 2,287                      | 1,520                        |
| DCF2               | 2,232                   | 1,946                      | 1,449                        |
| DCM1               | 6,131                   | 5,774                      | 1,538                        |
| DCM2               | 4,189                   | 3,936                      | 1,542                        |

215

216

**Table S3: Differential gene expression of 20 immune-related and 3 unidentified subclusters**

| <b>cell cluster</b> | <b>gene</b>                                                                                                                                                      |
|---------------------|------------------------------------------------------------------------------------------------------------------------------------------------------------------|
| B_C1                | <i>Ralgps2, Ighd, Fcrl1, Pxx, Pou2af1, B3gnt5, Rasgrp3, H2-Eb2, Vpreb3, Dipk1a, Trem12, Scd1, Cd22, Hs3st1, Snx8, Cpm, Lmo2, Siglecg, Ptp4a3, Snx9</i>           |
| B_C2                | <i>Gphn, Lars2, AY036118, Egr1, Bank1, Ddit3, Selenow, Ppp1r15a, Foxn3, Mef2c, Stt3b, Gm31243, Rpl36a, Plaur, Ebf1, Tmem123, Ccn11, Dmxl1, Fcer2a, Cd79a</i>     |
| B_C3                | <i>Slc7a7, H2-Eb2, Gm10552, Nampt, Cacna1e, Siglecg, Spib, Fam43a, Pkig, AC125149.3, Fcrl5, Dok3, Cxcr5, Pou2af1, Il5ra, Rab30, Plcg2, B3gnt5, Pard3b, Sypl</i>  |
| B_C4                | <i>Ighm, Igkc, Mucl2, Igkv12-89, Hsp90b1, Plac8, Klf2, Hspa5, Gm10076, Cd69, Cellf2, Napsa, mt-Co1, Ly6a, Mzb1, Sp140, Rpl10a, Txnip, Ly6d, Dnajc7</i>           |
| B_C5                | <i>Pde3b, Tuba1c, mt-Nd4, Foxo1, Malt1, Ago2, Arhgap31, Calm2, Itgb1, Luc7l2, Rpl9, 4930523C07Rik, Tut4, Dazap2, Ubl5, Stk17b, Kmt2e, Arpc3, Macf1, Tomm7</i>    |
| B_C6                | <i>Btbd9, Bach2, Snx29, Baz2b, Gm47782, Tcf12, Wasf2, Akt3, Kcnq5, Slc12a6, Tmem131l, Plekhh3, Prkce, Sipa1l1, Ptprrj, Pax5, Cmip, Cyth1, Ppp3ca, Lrrk2</i>      |
| Cd4_T_C1            | <i>Cdk11b, Actn1, Nsg2, Sugct, Frat2, Rflnb, Trib2, A930005H10Rik, Ifngr2, Fam241a, Patj, Dgka, Galnt6, Stat5a, Rab3ip, Klk8, Acot2, Ccdc117, Zfand2a, Kif1b</i> |
| Cd4_T_C2            | <i>Tspan13, Psme2, Ppp1cc, Fosl2, Atad2, Cxcr3, Icos, Tnfrsf1b, Cd4, Trat1, Arl4c, Sit1, Trac, Lcp2, Sh2b1, Pkp3, Hnrnp1l, Fasl, 9-Sep, S100a13</i>              |
| Cd4_T_C3            | <i>Malat1, Actb, Ifi27l2a, Lgals1, S100a10, Bhlhe40, Mif, Pfn1, Tnfrsf4, Akap13, AU020206, Hspa8, Ppia, Rgs16, Hif1a, Sdf4, Inpp4b, Tox, Npm1, Atp5b</i>         |
| Cd4_T_C4            | <i>H3f3b, Hilpda, Areg, Gnas, Nfkb1, Rora, Nrip1, Cstb, Rdm1, Phlda1, Mgat5, Dusp5, Rgcc, Cdkn1a, Atp5md, Rgs2, Gm20186, Pim1, Samsn1, Tex14</i>                 |
| Cd8_T_C1            | <i>Coro2a, Lax1, Pdcd1, Klrk1, Fasl, Padi2, Trgv2, Prkcz, Cdh1, Trac, Ifitm10, Cxcr6, Rinl, Itga1, Itgb2, Gm44174, Gimap7, Eif2s3y, Asap2, Sema4a</i>            |
| Cd8_T_C2            | <i>Ccl5, Ly6c2, Nkg7, Slc3a2, Ctla2a, Tomm5, Prdx6, Gzmk, Eomes, Grap2, Odc1, Smc4, Tigit, Sidt1, Cnn2, Atp5e, Ms4a4b, Simc1, Trbc2, Hnrnpa2b1</i>               |
| Cd8_T_C3            | <i>Eef1a1, Rps24, Rpl13, Rps15a, Rpl18, Rps7, Rps16, Uba52, Tmsb10, Rps5, Rpl9-ps6, Rps20, Rps4x, Rpsa, Rplp0, Rps3, Camk1d, Rpl30, Rps3a1, Rpl18a</i>           |
| Cd8_T_C4            | <i>Lncpint, Zeb1, Elmo1, Rabgap1l, Maml2, Esyt2, Themis, Dock2, Epb41l2, Iqgap2, Rras2, Ankrd44, Itpkb, Arid1b, Ao pep, Smyd3, Fyn, Vps54, Skap1, Lrba</i>       |
| Cd8_T_C5            | <i>Ifit1, Rsad2, Isg15, Ifit3, Phf11b, Samhd1, Stat1, Ifi47, H2-T22, Zbp1, Ms4a4b, Smchd1, Isg20, Rtp4, Gbp6, Ifit3b, Ifi208, Zc3hav1, AW112010, Ifi203</i>      |

|               |                                                                                                                                                                                                                                                                                            |
|---------------|--------------------------------------------------------------------------------------------------------------------------------------------------------------------------------------------------------------------------------------------------------------------------------------------|
| Macrophage_C1 | <i>Ccl4, Cd74, Ccl3, Fth1, Rgs1, Apoe, Plau, Hspa1a, Atf3, C1qb, Ubc, Dusp1, Sat1, Kctd12, Fos, Cd14, Hexb, Dnajb1, Hsp90aa1, C1qc</i>                                                                                                                                                     |
| Macrophage_C2 | <i>Lyz2, Cst3, Ifitm3, Vim, Ifi30, Tmsb4x, Bst2, Ifitm2, Lgals3, Fabp5, Grn, H2-Aa, Cebpb, Tyrobp, Ccl6, Gm2a, Nfkbia, Dleu2, Tmem176b, Tagln2</i>                                                                                                                                         |
| Macrophage_C3 | <i>Aif1, Cd68, Slamf9, Trf, Ckb, Cd300c2, Trem2, Pea15a, Axl, Fcgr3, Zmynd15, Fcgr1, Camk1, Tgfb, Adgre1, Itgln1, Klra4, Zfp36l2, Litaf, Isy1, Hcst, Klra9, Ncr1, Klrb1b, Klrb1c, Dnajb6, Styk1, Klri2, Clnk, Klrk1, Rin3, Chn2, Ctla2b, Arrdc4, Car2b5, Lilra5, Scimp, Tmem119, Timp2</i> |
| NK_C1         | <i>Ifnrg1, Klra4, Zfp36l2, Litaf, Isy1, Hcst, Klra9, Ncr1, Klrb1b, Klrb1c, Dnajb6, Styk1, Klri2, Clnk, Klrk1, Rin3, Chn2, Ctla2b, Arrdc4, Car2</i>                                                                                                                                         |
| NK_C2         | <i>Gzma, Gzmc, Zfp36, Gzmb, Cd3g, Xcl1, Cd7, Il2rb, H2-D1, Jun, Irf8, Fcer1g, Dusp2, Arf4, Junb, Ctsd, Ctsw, Klra8, Sh2d2a, Il21r</i>                                                                                                                                                      |
| UN_C1         | <i>Klk1, Scgb2b27, Klk1b26, Fxyd2, Bglap3, Klk1b9, Klk1b5, Crisp3, S100a1, Chchd10, Tfcp2l1, Serp1, mt-Nd4l, Klk1b11, Phyh, mt-Atp8, Fxyd3, Cox7c, Klk1b22, Mdh1</i>                                                                                                                       |
| UN_C2         | <i>Alas2, Hba-a1, Ube2l6, Fech, Bpgm, Snca, Apol11b, Gypa, Prdx2, Isg20, Car2, 2-Mar, Slc4a1, Prxl2a, Slc25a39, Ube2c, Blvrb, Epb41, Slc25a37, Bnip3l</i>                                                                                                                                  |
| UN_C3         | <i>Mgp, Ly6c1, Clu, Ltbp4, Tm4sf1, Ptprb, Egfl7, Eln, Pecam1, Cldn5, Ptprm, Slc9a3r2, Cdh13, Igfbp7, Cyt11, Ramp2, Ldb2, Timp3, Bcam, Fbln2</i>                                                                                                                                            |

---

218

219

220 **Table S4: Top 5 differentially expressed genes within B, CD4<sup>+</sup>, and CD8<sup>+</sup> T cell subsets**

| <b>cell cluster</b> | <b>differentially expressed genes</b> |                 |                     |                 |                 |
|---------------------|---------------------------------------|-----------------|---------------------|-----------------|-----------------|
| B_C1                | <i>Fcer2a</i>                         | <i>Pxk</i>      | <i>Pkib</i>         | <i>Sell</i>     | <i>Lrrk2</i>    |
| B_C2                | <i>Slc15a2</i>                        |                 |                     |                 |                 |
| B_C3                | <i>CD44</i>                           | <i>Atf3</i>     | <i>A530032D15Ri</i> | <i>Arhgap24</i> | <i>Cd9</i>      |
| B_C4                | <i>Igkv12-89</i>                      | <i>ApoE</i>     | <i>Vim</i>          | <i>Odc1</i>     | <i>Igkv4-63</i> |
| B_C5                | <i>Ccl5</i>                           | <i>Cd3e</i>     | <i>Itk</i>          | <i>Lat</i>      | <i>Emb</i>      |
| B_C6                | <i>Akt3</i>                           | <i>Arhgap26</i> | <i>Elmo1</i>        | <i>Tcf12</i>    | <i>Lncpint</i>  |
| CD4_T_C1            | <i>Lef1</i>                           | <i>Ccr7</i>     | <i>Satb1</i>        | <i>CD8b1</i>    | <i>Igfbp4</i>   |
| CD4_T_C2            | <i>Ccl5</i>                           | <i>S100a6</i>   | <i>Itgb1</i>        | <i>Ahnak</i>    | <i>S100a4</i>   |
| CD4_T_C3            | <i>Tnfsf8</i>                         | <i>Bhlhe40</i>  | <i>Ctla4</i>        | <i>Tnfrsf4</i>  | <i>Rgs16</i>    |
| CD4_T_C4            | <i>Rora</i>                           | <i>Il17a</i>    | <i>Tmem176b</i>     | <i>Tmem176a</i> | <i>Fosb</i>     |
| CD8_T_C1            | <i>S100a6</i>                         | <i>Xcl1</i>     | <i>Cxcr6</i>        | <i>Litaf</i>    | <i>Coro2a</i>   |
| CD8_T_C2            | <i>Ccl5</i>                           | <i>Ly6c2</i>    | <i>Sidt1</i>        | <i>Eomes</i>    | <i>Pde2a</i>    |
| CD8_T_C3            | <i>Ccr7</i>                           | <i>Klf2</i>     | <i>Lef1</i>         | <i>Dusp10</i>   | <i>Satb1</i>    |
| CD8_T_C4            | <i>Zswim6</i>                         | <i>Lncpint</i>  | <i>Elmo1</i>        | <i>Maml2</i>    | <i>Slc9a9</i>   |
| CD8_T_C5            | <i>Ifit3</i>                          | <i>Isg15</i>    | <i>Ifit1</i>        | <i>Rtp4</i>     | <i>Zbp1</i>     |

221

222

223

224 **Table S5: Enumeration of infiltrating cell types via flow cytometry.** After exporting counts  
 225 from Flow Jo, GraphPad Prism v8 was utilized to calculate the average +/- SEM for each cell  
 226 type in the DMSO and CPYPP treated SJD<sup>S</sup> mice. \*p<0.05 by Mann-Whitney one-tailed t-tests.

| Cell type    | DMSO    |       | CPYPP   |      |
|--------------|---------|-------|---------|------|
|              | Avg ±   | SEM   | Avg ±   | SEM  |
| <b>CD4</b>   | 530.4 ± | 315.8 | 106.4 ± | 84.7 |
| <b>CD8</b>   | 181.4 ± | 97.1  | 15.2 ±  | 4.3* |
| <b>Th17</b>  | 11.6 ±  | 5.5   | 3.4 ±   | 1.2* |
| <b>Th1</b>   | 2.4 ±   | 1.5   | 7 ±     | 5.1  |
| <b>Tc17</b>  | 10.6 ±  | 5.7   | 1.8 ±   | 0.8  |
| <b>Tc1</b>   | 25 ±    | 7.5   | 8.6 ±   | 3.2* |
| <b>MZB</b>   | 3.8 ±   | 1.7   | 1.6 ±   | 0.7  |
| <b>FO I</b>  | 28.8 ±  | 5.2   | 29 ±    | 18.5 |
| <b>FO II</b> | 1.6 ±   | 0.5   | 0.8 ±   | 0.4* |
| <b>FO</b>    | 30.2 ±  | 5.3   | 29.8 ±  | 18.6 |

227  
 228

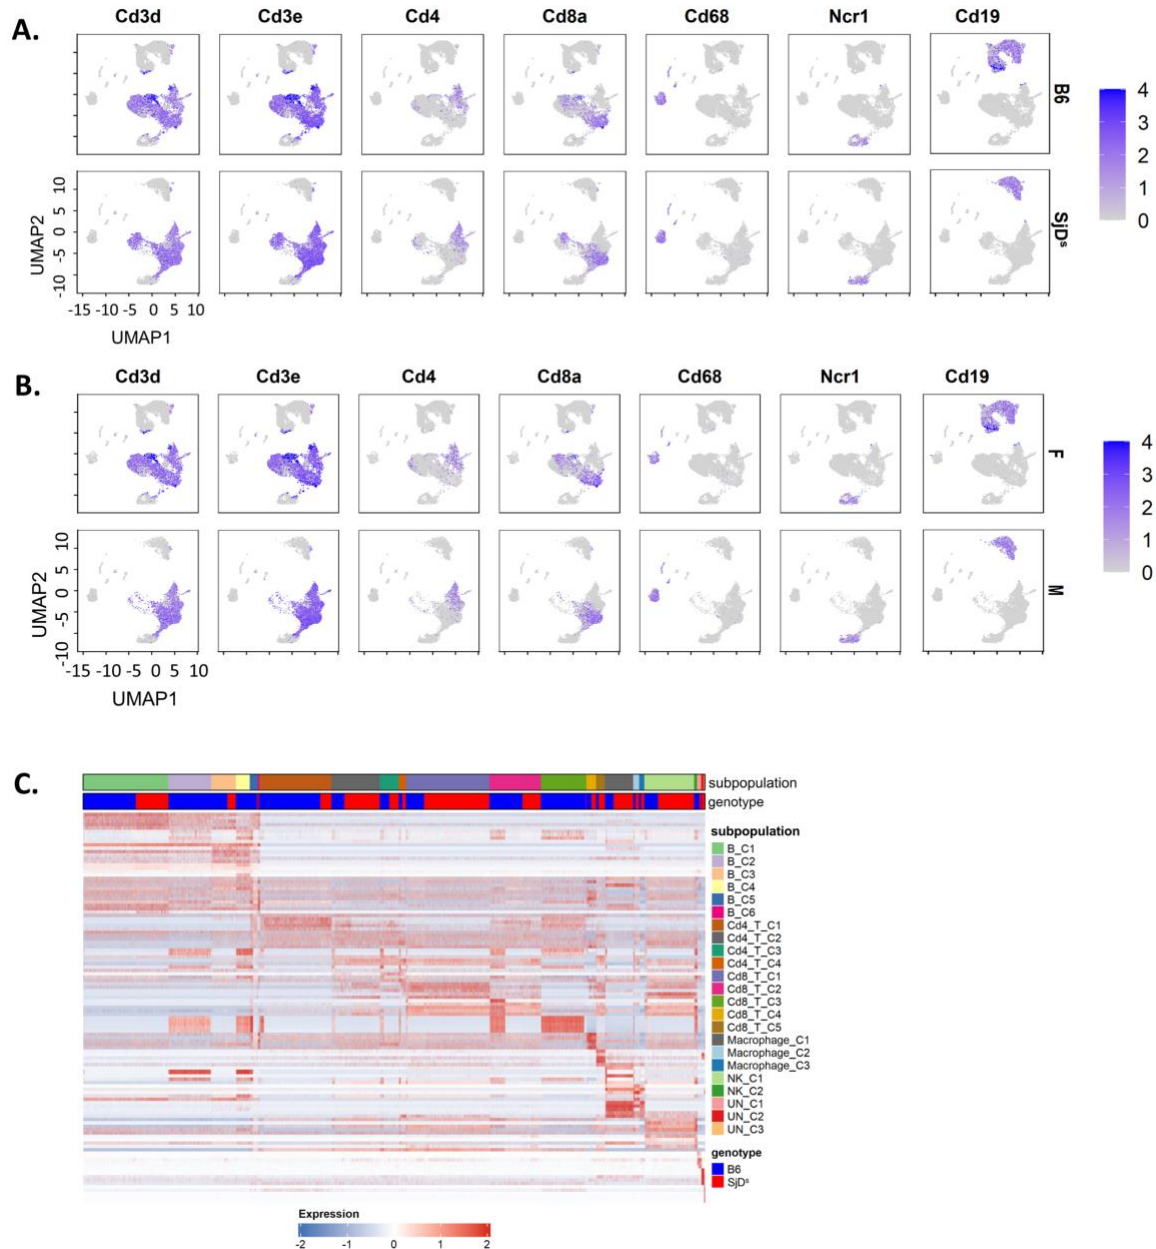

229

230 **Figure S1. Cellular composition differences by sex and disease phenotypes. (A, B)** UMAP  
 231 plots show the expression levels of selected marker genes in different clusters compared between  
 232 genotype **(A)** and sex **(B)**, with colors representing clusters expressing the genes and color  
 233 densities representing different levels of selected gene expression. **(C)** Comprehensive gene  
 234 expression heatmap across different subpopulations and with genotype distribution.



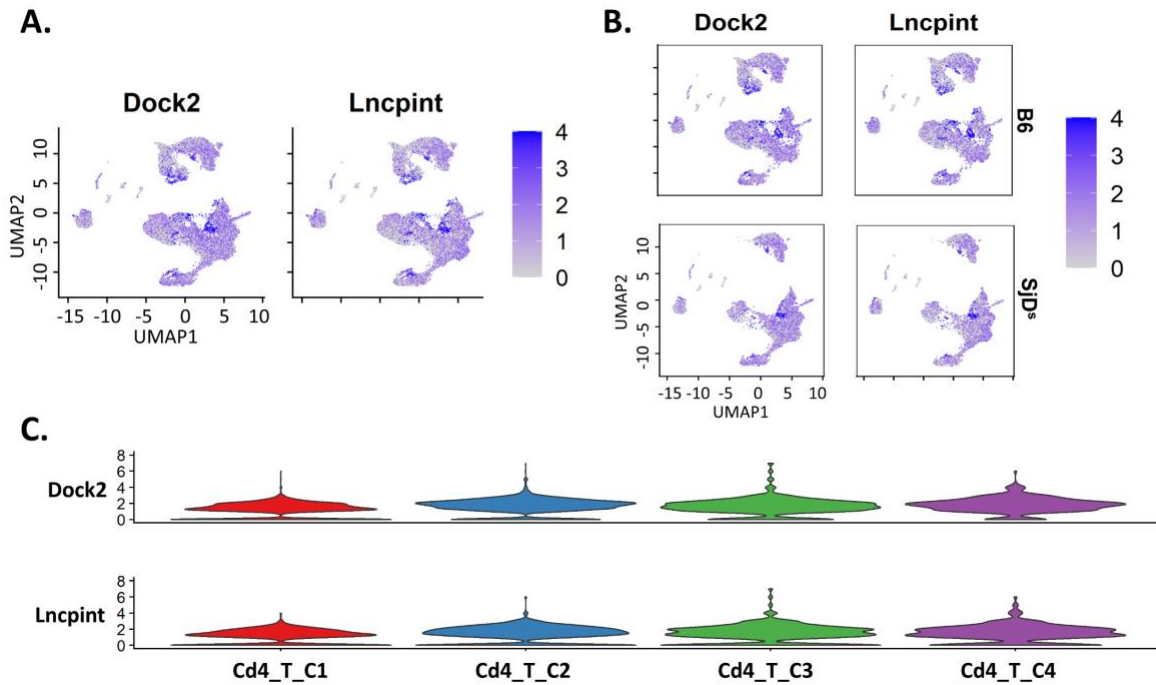

235

236 **Figure S2. *Dock2* and *Lncpint* transcribed at varying levels across all immune cell subsets**

237 **(A, B)** UMAP plots show the expression levels of *Dock2* and *Lncpint* in different clusters overall

238 **(A)** and compared between genotype **(B)**, with colors representing clusters expressing the genes

239 and color densities representing different levels of selected gene expression. **(C)** Violin plots

240 showing expression levels of *Dock2* and *Lncpint* in four different subpopulations of CD4<sup>+</sup> T cells.

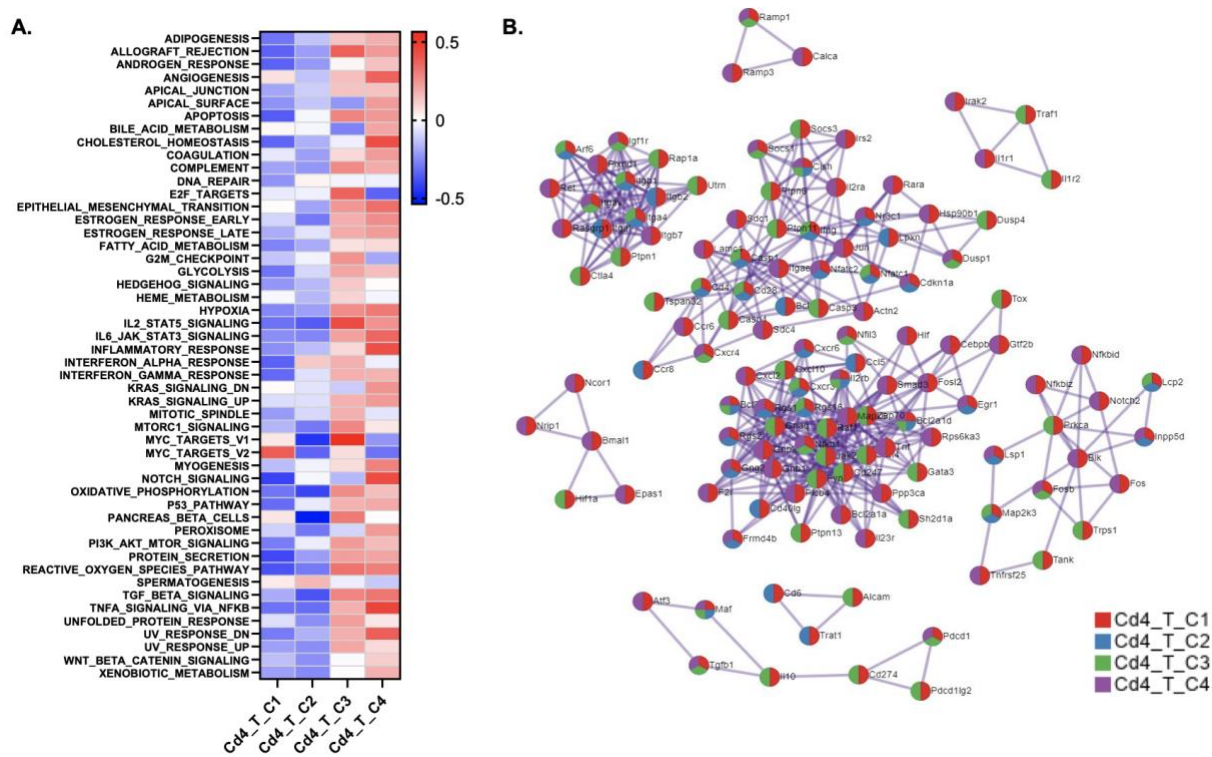

241

242 **Figure S3. Additional genetic networks analysis for CD4<sup>+</sup> T cells.** (A) Genomic variation  
 243 analysis (GSVA) of the mouse MSigDB 50 hallmark gene sets in each Cd4 T cell subset by p-  
 244 value. (B) Protein-protein interaction networks (PPI) of differentially expressed genes (DEGs) in  
 245 each Cd4 T cell subcluster, to which the Molecular Complex Detection (MCODE) algorithm is then  
 246 applied to identify densely connected neighborhoods of proteins. Network nodes are shown as  
 247 pies. Different pie area colors represent individual gene lists.

248

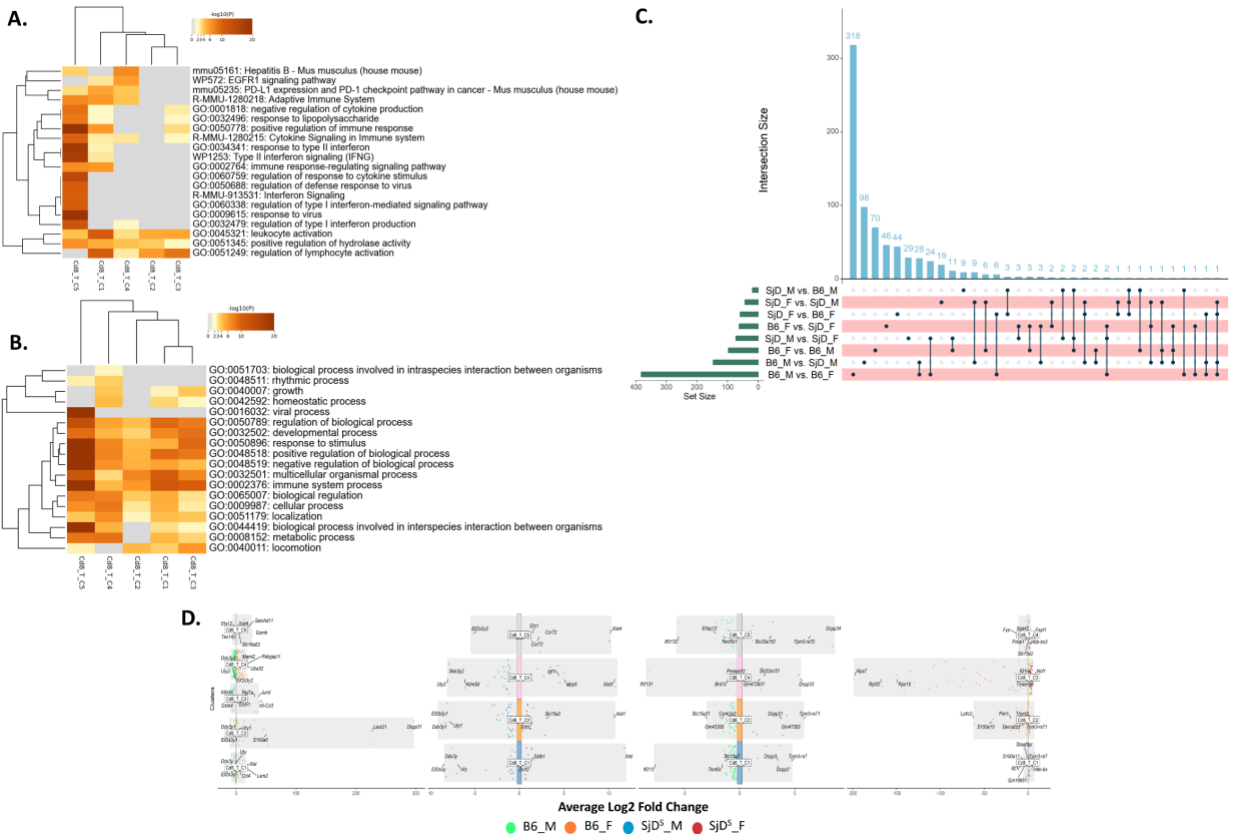

249

250 **Fig. S4. Biological pathways of CD8<sup>+</sup> effector T cells in the salivary glands of SjD mice. (A)**

251 Significantly enriched pathway and (B) biological process of individual T cell subset of CD8<sup>+</sup> T

252 cells. (C) UpSet plots show a matrix layout of all intersections of the eight comparison datasets in

253 CD8<sup>+</sup> T cells (by each genotype and gender, separately) and sorted by size. The size of each

254 comparison dataset was indicated as a green bar on the left, showing the number of up-regulated

255 genes in the right dataset compared to the left dataset. Dark circles in the matrix indicate sets of

256 genes with corresponding intersections, where the number of genes in each set is shown above

257 the blue bar graph. The connecting lines indicate the comparison sets that share this gene set

258 (two sets or more). In the B6 background, male mice have 318 upregulated DEGs compared to

259 females and 98 upregulated DEGs compared to SJD<sup>S</sup> genotype. 28 genes were shared among

260 this two-comparison dataset, which means male B6 mice have a more distinct gene expression

261 profile. (D) Volcano plot of DEGs between paired experimental groups of individual CD8<sup>+</sup> T cell

262 subpopulations. Different colored dots represent DEGs in each group and are indicated in the  
263 legend below the figure. The top 3 genes in each group (if more than 3 genes were identified)  
264 were labeled in the figure.

265

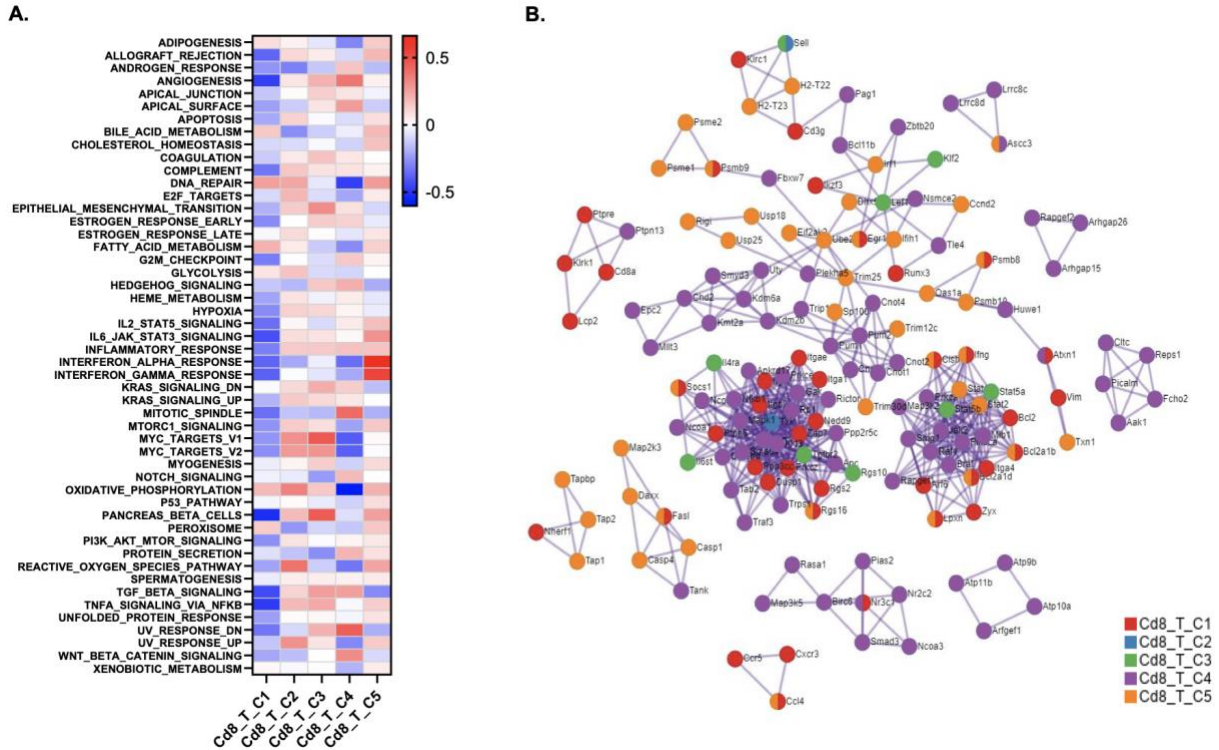

267

268 **Figure S5. Additional genetic network analysis for CD8<sup>+</sup> T cells.** (A) Genomic variation

269 analysis (GSEA) of the mouse MSigDB 50 hallmark gene sets in each Cd8 T cell subset by p-

270 value. (B) Protein-protein interaction networks (PPI) of differentially expressed genes (DEGs) in

271 each Cd8 T cell subcluster, to which the Molecular Complex Detection (MCODE) algorithm is then

272 applied to identify densely connected neighborhoods of proteins. Network nodes are shown as

273 pies. Different pie area colors represent individual gene lists.

274

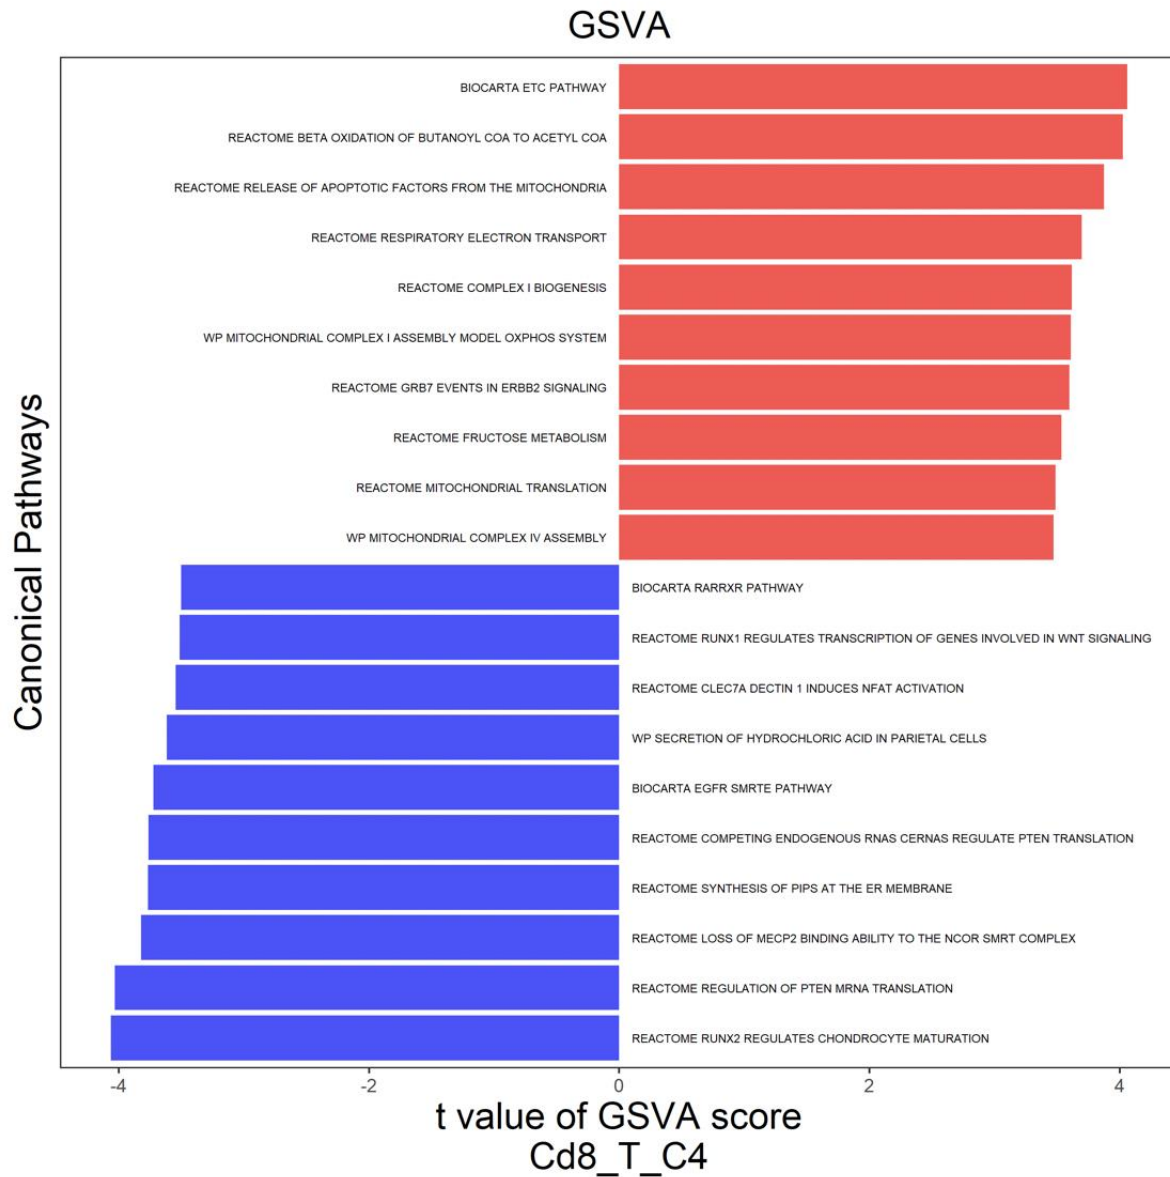

275

276 **Figure S6. Genomic variation analysis (GSVA) of the unique Cd8\_T\_C4 subpopulation**  
 277 **compared to other CD8<sup>+</sup> T cell subpopulations.**

278

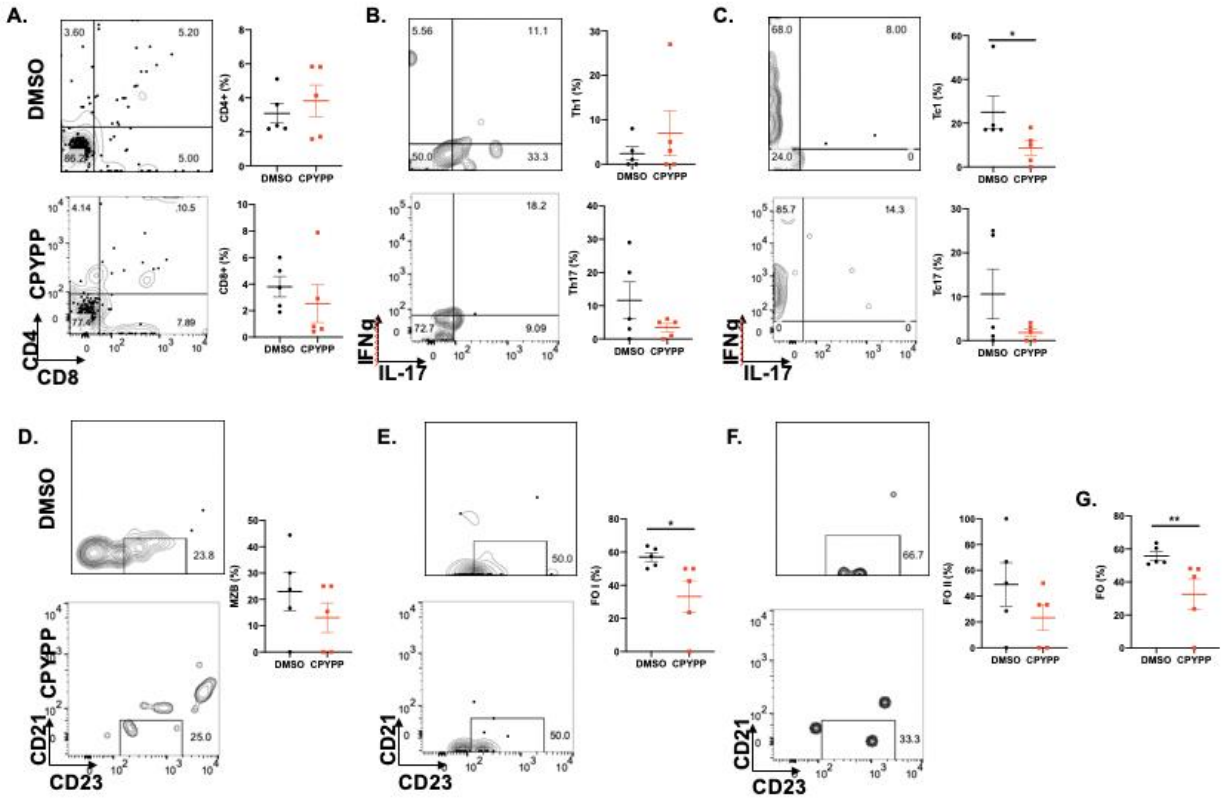

280

281 **Figure S7. The effect of DOCK2 inhibitor on the infiltrating cells in the salivary gland.** Flow  
282 cytometric analysis was performed for CD4<sup>+</sup> and CD8<sup>+</sup> T cells (A), Th1 and Th17 cells (B), Tc1  
283 and Tc17 cells (C), MZB (D), follicular B cell type I (E), follicular B cell type II (F), and follicular B  
284 cell (G). Sjd<sup>s</sup> mice were treated with CPYPP at 28 weeks of age. Mice were given an initial dose  
285 of 100 uL of either 50 mg/mL CPYPP (n=5) or DMSO alone (n=5) as control via IP injection. Three  
286 more DMSO or CPYPP IP injections were given on days 3, 9, and 12. Mice were monitored for  
287 two weeks. Representative flow cytometric images for each analysis were shown. A one-tailed  
288 Mann-Whitney test was performed with error bars, \*p < 0.05 and \*\*p < 0.01.

289



290 **References**

- 291 1. Brayer J, Lowry J, Cha S, Robinson CP, Yamachika S, Peck AB, et al. Alleles from  
292 chromosomes 1 and 3 of NOD mice combine to influence Sjögren's syndrome-like autoimmune  
293 exocrinopathy. *J Rheumatol* 2000;27:1896–1904.
- 294 2. Cha S, Nagashima H, Peck AB, Humphreys-Beher MG. IDD3 and IDD5 alleles from nod mice  
295 mediate Sjögren's syndrome-like autoimmunity. *Adv Exp Med Biol* 2002;506:1035–1039.
- 296 3. Shiboski CH, Shiboski SC, Seror R, Criswell LA, Labetoulle M, Lietman TM, et al. 2016  
297 American College of Rheumatology/European League Against Rheumatism classification  
298 criteria for primary Sjögren's syndrome: A consensus and data-driven methodology involving  
299 three international patient cohorts. *Ann Rheum Dis* 2017;76:9–16.
- 300 4. Wanchoo A, Voigt A, Sukumaran S, Stewart CM, Bhattacharya I, Nguyen CQ. Single-cell  
301 analysis reveals sexually dimorphic repertoires of Interferon- $\gamma$  and IL-17A producing T cells in  
302 salivary glands of Sjögren's syndrome mice. *Sci Rep* 2017;7:12512.
- 303 5. Zhang L, Yu X, Zheng L, Zhang Y, Li Y, Fang Q, et al. Lineage tracking reveals dynamic  
304 relationships of T cells in colorectal cancer. *Nature* 2018;564:268–272.
- 305 6. Leruste A, Tosello J, Ramos RN, Tauziède-Espariat A, Brohard S, Han Z-Y, et al. Clonally  
306 expanded T cells reveal immunogenicity of rhabdoid tumors. *Cancer Cell* 2019;36:597–612.e8.
- 307 7. Li H, van der Leun AM, Yofe I, Lubling Y, Gelbard-Solodkin D, van Akkooi ACJ, et al.  
308 Dysfunctional CD8 T Cells Form a Proliferative, Dynamically Regulated Compartment within  
309 Human Melanoma. *Cell* 2019;176:775–789.e18.
- 310 8. Cano-Gamez E, Soskic B, Roumeliotis TI, So E, Smyth DJ, Baldrighi M, et al. Single-cell  
311 transcriptomics identifies an effectorness gradient shaping the response of CD4+ T cells to  
312 cytokines. *Nat Commun* 2020;11:1801.
- 313 9. Ren X, Wen W, Fan X, Hou W, Su B, Cai P, et al. COVID-19 immune features revealed by a  
314 large-scale single-cell transcriptome atlas. *Cell* 2021;184:1895–1913.e19.
- 315 10. Finak G, McDavid A, Yajima M, Deng J, Gersuk V, Shalek AK, et al. MAST: a flexible  
316 statistical framework for assessing transcriptional changes and characterizing heterogeneity in  
317 single-cell RNA sequencing data. *Genome Biol* 2015;16:278.
- 318 11. Subramanian A, Tamayo P, Mootha VK, Mukherjee S, Ebert BL, Gillette MA, et al. Gene set  
319 enrichment analysis: a knowledge-based approach for interpreting genome-wide expression  
320 profiles. *Proc Natl Acad Sci USA* 2005;102:15545–15550.

321

322

323
